# Supplementary material for: Human proximal tubular epithelial cell interleukin-1 receptor signalling triggers G2/M arrest and cellular senescence during hypoxic kidney injury
Source: PubMed Central journal article supplement (PMC11785723; doi:10.1038/s41419-025-07386-6), 2025-01-31

Figure 1F

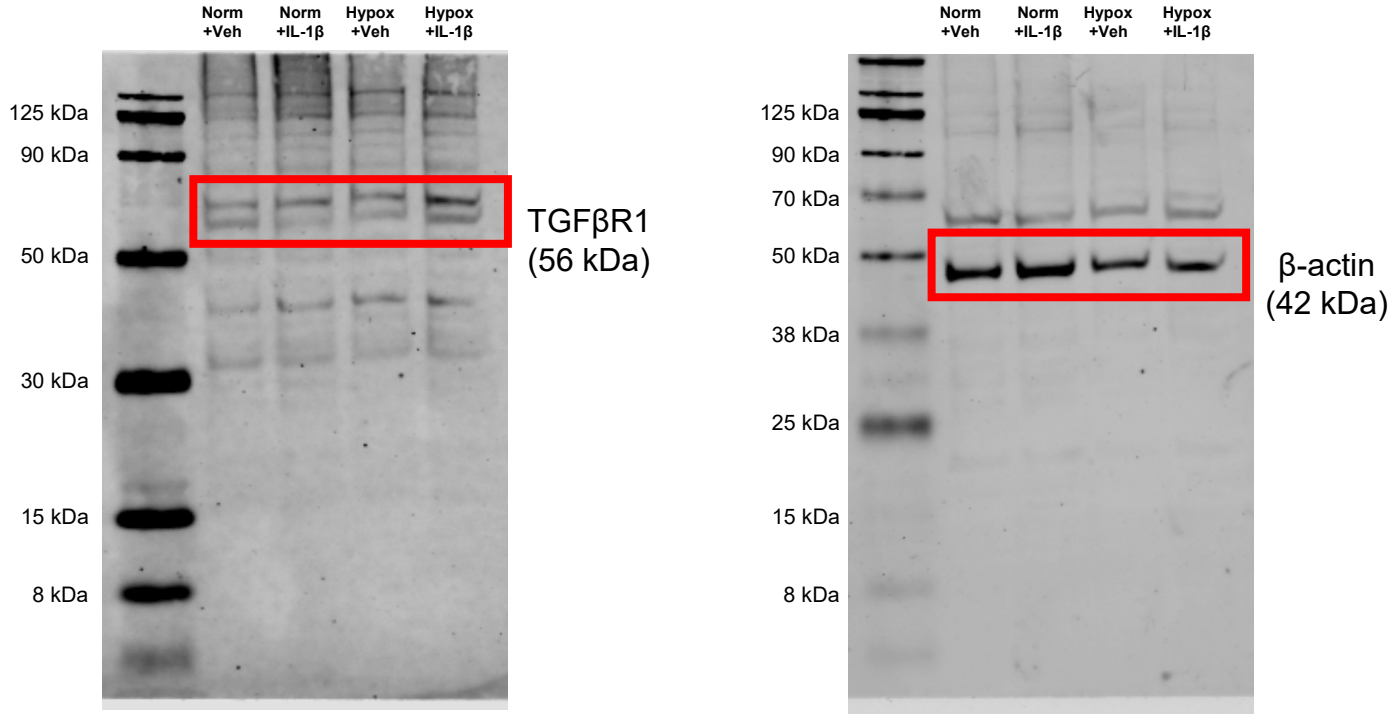

Figure 2D

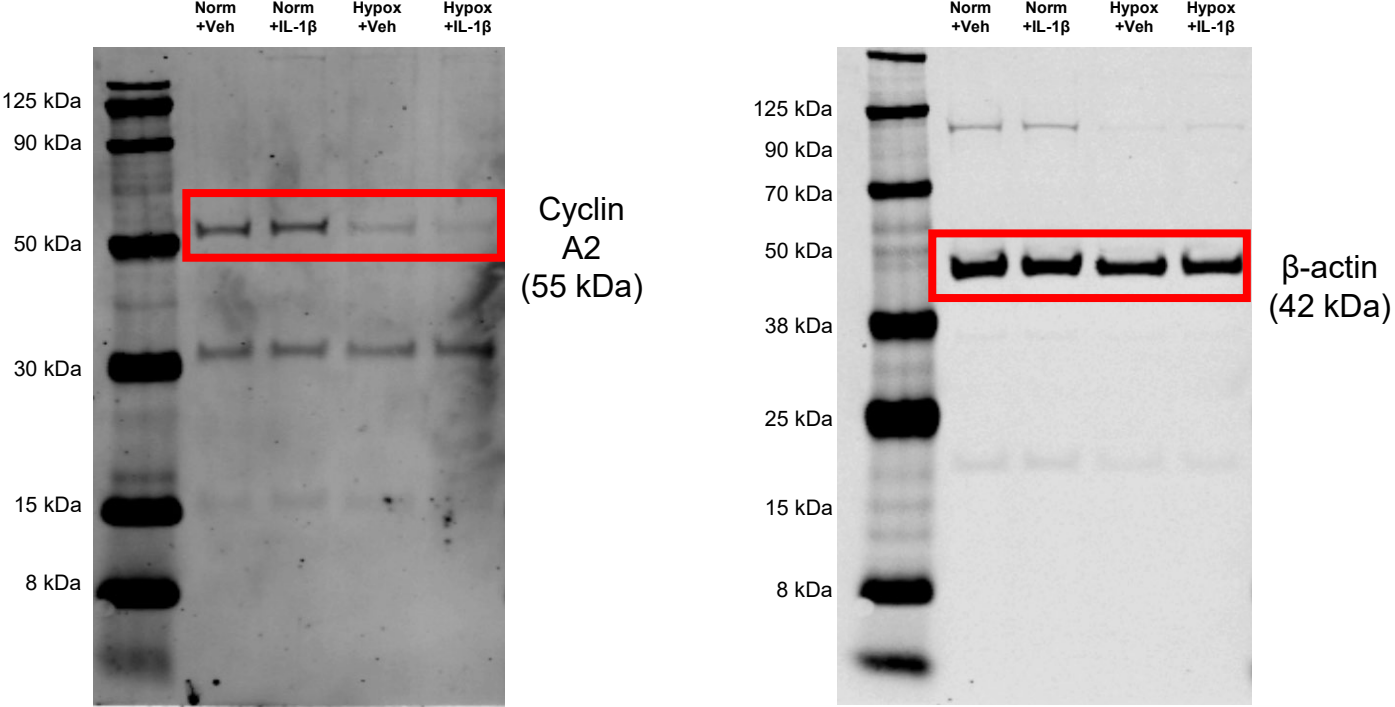

Figure S2D

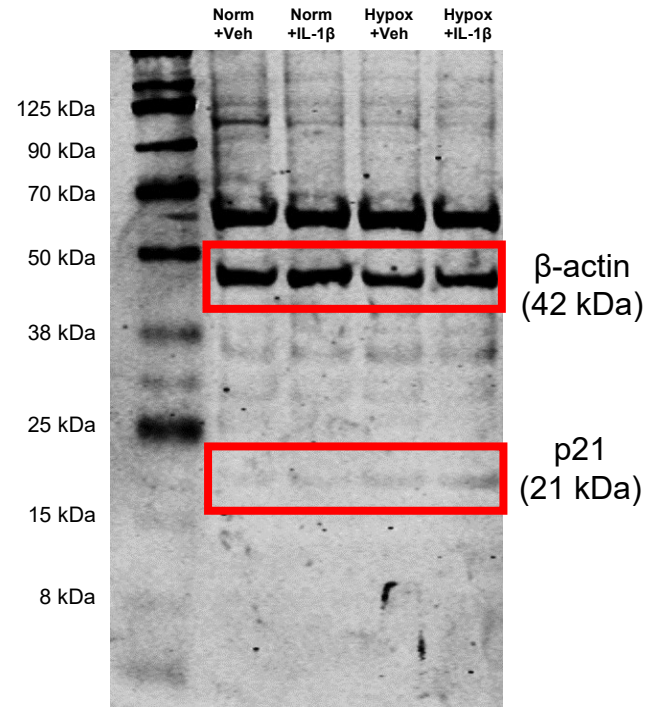

Supplement: 41419_2025_7386_MOESM4_ESM.pdf [file 41419_2025_7386_MOESM4_ESM.pdf]
